# Supplementary material for: Systematic identification and characterization of chicken (Gallus gallus) ncRNAs
Source: PubMed Central journal article supplement — Nucleic Acids Res. 2009 Aug 31;37(19):6562–74. doi: 10.1093/nar/gkp704 (PMC2770669; doi:10.1093/nar/gkp704), 2009-08-31
Supplement: gkp704_1.pdf [file gkp704_1.pdf]

# Supplemental Figure 1 Tissue expression pattern of chicken ncRNAs

- **Total 125 chicken ncRNAs identified in this study**

Besides 20 ncRNAs shown in the right table, which occurred multiple reads in our ncRNA library sequencing, the rest 105 ncRNAs were further confirmed by Northern blot.

- **The expression pattern of 105 ncRNAs**

- √ 35 novel ncRNA candidates shown in Figure 2
- √ 5 ncRNAs shown in Figure 6
- √ 65 ncRNAs presented in here

- **Figure legend**

The expression pattern of each chicken ncRNA was analyzed by Northern blot with total RNA from chicken heart, liver, lung, spleen, kidney, intestine, skeletal muscles and brain. Total RNA from human and mouse skeletal muscle were loaded in each blot in order to check the expression of each ncRNA across different species. All ncRNAs were labeled as GgnX\_identity\_size on the left of each Northern blot. For examples: Ggn36\_SNORD94\_142 nt means Ggn36 with length 142 nt is a C/D box snoRNA SNORD94; Ggn88\_SNORA55\_130 nt means Ggn88 with length 130 nt is a H/ACA box snoRNA SNORA55.

|        |                |
|--------|----------------|
| Ggn102 | SNORD51_71 nt  |
| Ggn12  | SNORD58_67 nt  |
| Ggn30  | SNORD58_67 nt  |
| Ggn40  | SNORD36a_72 nt |
| Ggn69  | SNORD16_104 nt |
| Ggn75  | SNORD36b_76 nt |
| Ggn81  | SNORD49_75 nt  |
| Ggn115 | SNORA65_136 nt |
| Ggn49  | SNORA72_134 nt |
| Ggn14  | SNORD16_54 nt  |
| Ggn113 | U2_188 nt      |
| Ggn121 | U4_144 nt      |
| Ggn122 | SNORD15_143 nt |
| Ggn129 | U5_115 nt      |
| Ggn130 | U4_144 nt      |
| Ggn57  | U12_149 nt     |
| Ggn59  | U6_87 nt       |
| Ggn6   | SNORD18_66 nt  |
| Ggn63  | U1_164 nt      |
| Ggn78  | SNORD15_149 nt |
