# Supplementary material for: Systematic identification and characterization of chicken (Gallus gallus) ncRNAs
Source: PubMed Central journal article supplement — Nucleic Acids Res. 2009 Aug 31;37(19):6562–74. doi: 10.1093/nar/gkp704 (PMC2770669; doi:10.1093/nar/gkp704), 2009-08-31

## Supplemental Figure 2

### Three snoRNAs are conserved in human but not in mouse.

#### Figure legend

The expression pattern of three snoRNAs were analyzed by Northern blot with total RNA from human and mouse tissues, including heart, liver, lung, spleen, kidney, intestine, stomach, fat, intestine, pancreas, skeletal muscles and brain. Chicken RNA sample from myoblast were added as positive control. Ggn5, Ggn51 and Ggn 112 can be detected in human tissues but not in mouse tissues. Ggn65\_U5snRNA as control.

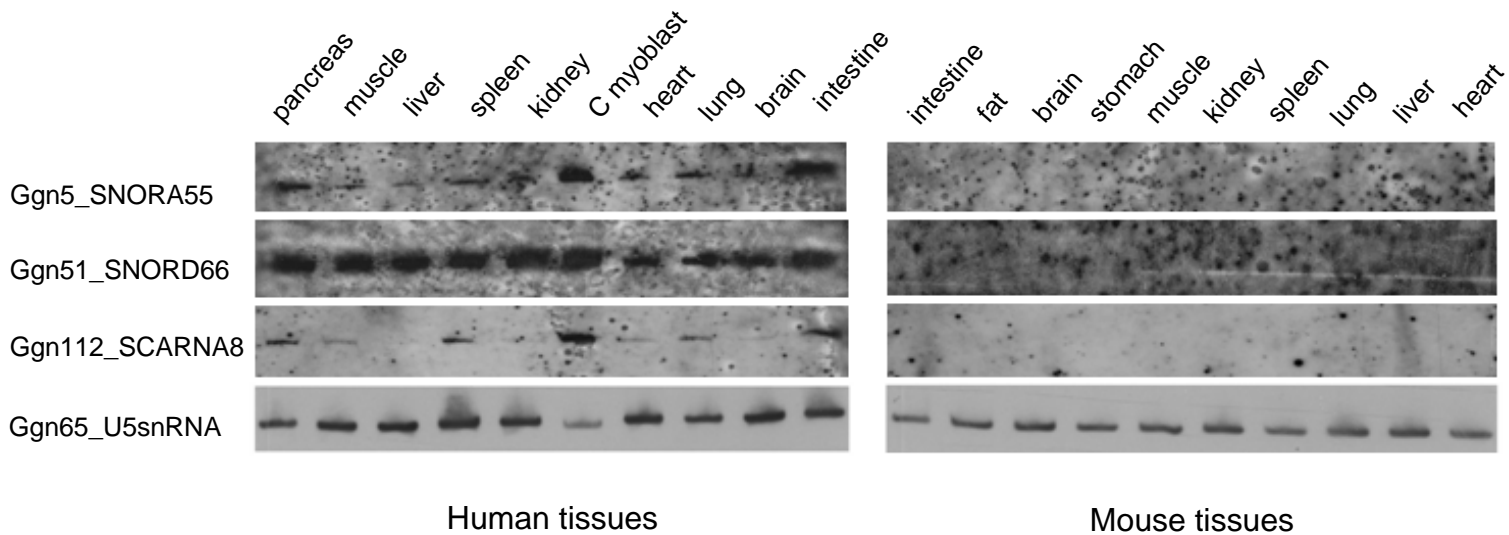

Supplement: gkp704_2.pdf [file gkp704_2.pdf]
