# Supplementary material for: Systematic identification and characterization of chicken (Gallus gallus) ncRNAs
Source: PubMed Central journal article supplement — Nucleic Acids Res. 2009 Aug 31;37(19):6562–74. doi: 10.1093/nar/gkp704 (PMC2770669; doi:10.1093/nar/gkp704), 2009-08-31

## Supplemental Figure 3

### A single intron hosting two copies of ncRNA

#### Figure legend

Red boxes represent exons, red lines represent introns. Blue boxes represent 5' and 3' UTRs. Green boxes represent the loci of ncRNAs in the indicated introns. Two copies of U5 snRNA are both located at the 5th intron of hypothetical protein LOC424582. Two copies of an unclassified ncRNA candidate Ggn46 are both located at the third intron of protein RPL3.

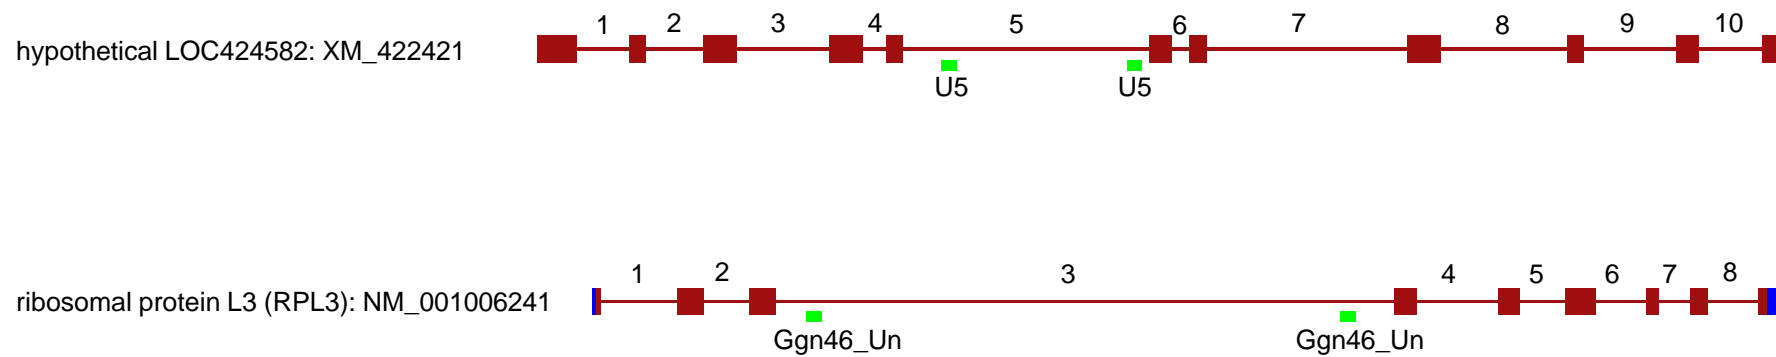

Supplement: gkp704_3.pdf [file gkp704_3.pdf]
