# Supplementary material for: Systematic identification and characterization of chicken (Gallus gallus) ncRNAs
Source: PubMed Central journal article supplement — Nucleic Acids Res. 2009 Aug 31;37(19):6562–74. doi: 10.1093/nar/gkp704 (PMC2770669; doi:10.1093/nar/gkp704), 2009-08-31

## **Supplemental Figure 4**

### **Enrichment analysis of snoRNA host genes according to the Cellular Component category of Gene Ontology**

#### **Figure legend**

GO terms enriched for host genes of both C/D box and H/ACA box snoRNAs are shown as yellow boxes, GO terms enriched only for host genes of C/D box snoRNAs are shown as red boxes, and GO terms enriched only for host genes of H/ACA box snoRNAs are shown as green boxes. The p-values for enrichment significance of each GO term are shown within the GO term boxes. Non-enriched GO terms in the hierarchical tree of GO terms are shown as dots to reduce the figure size.

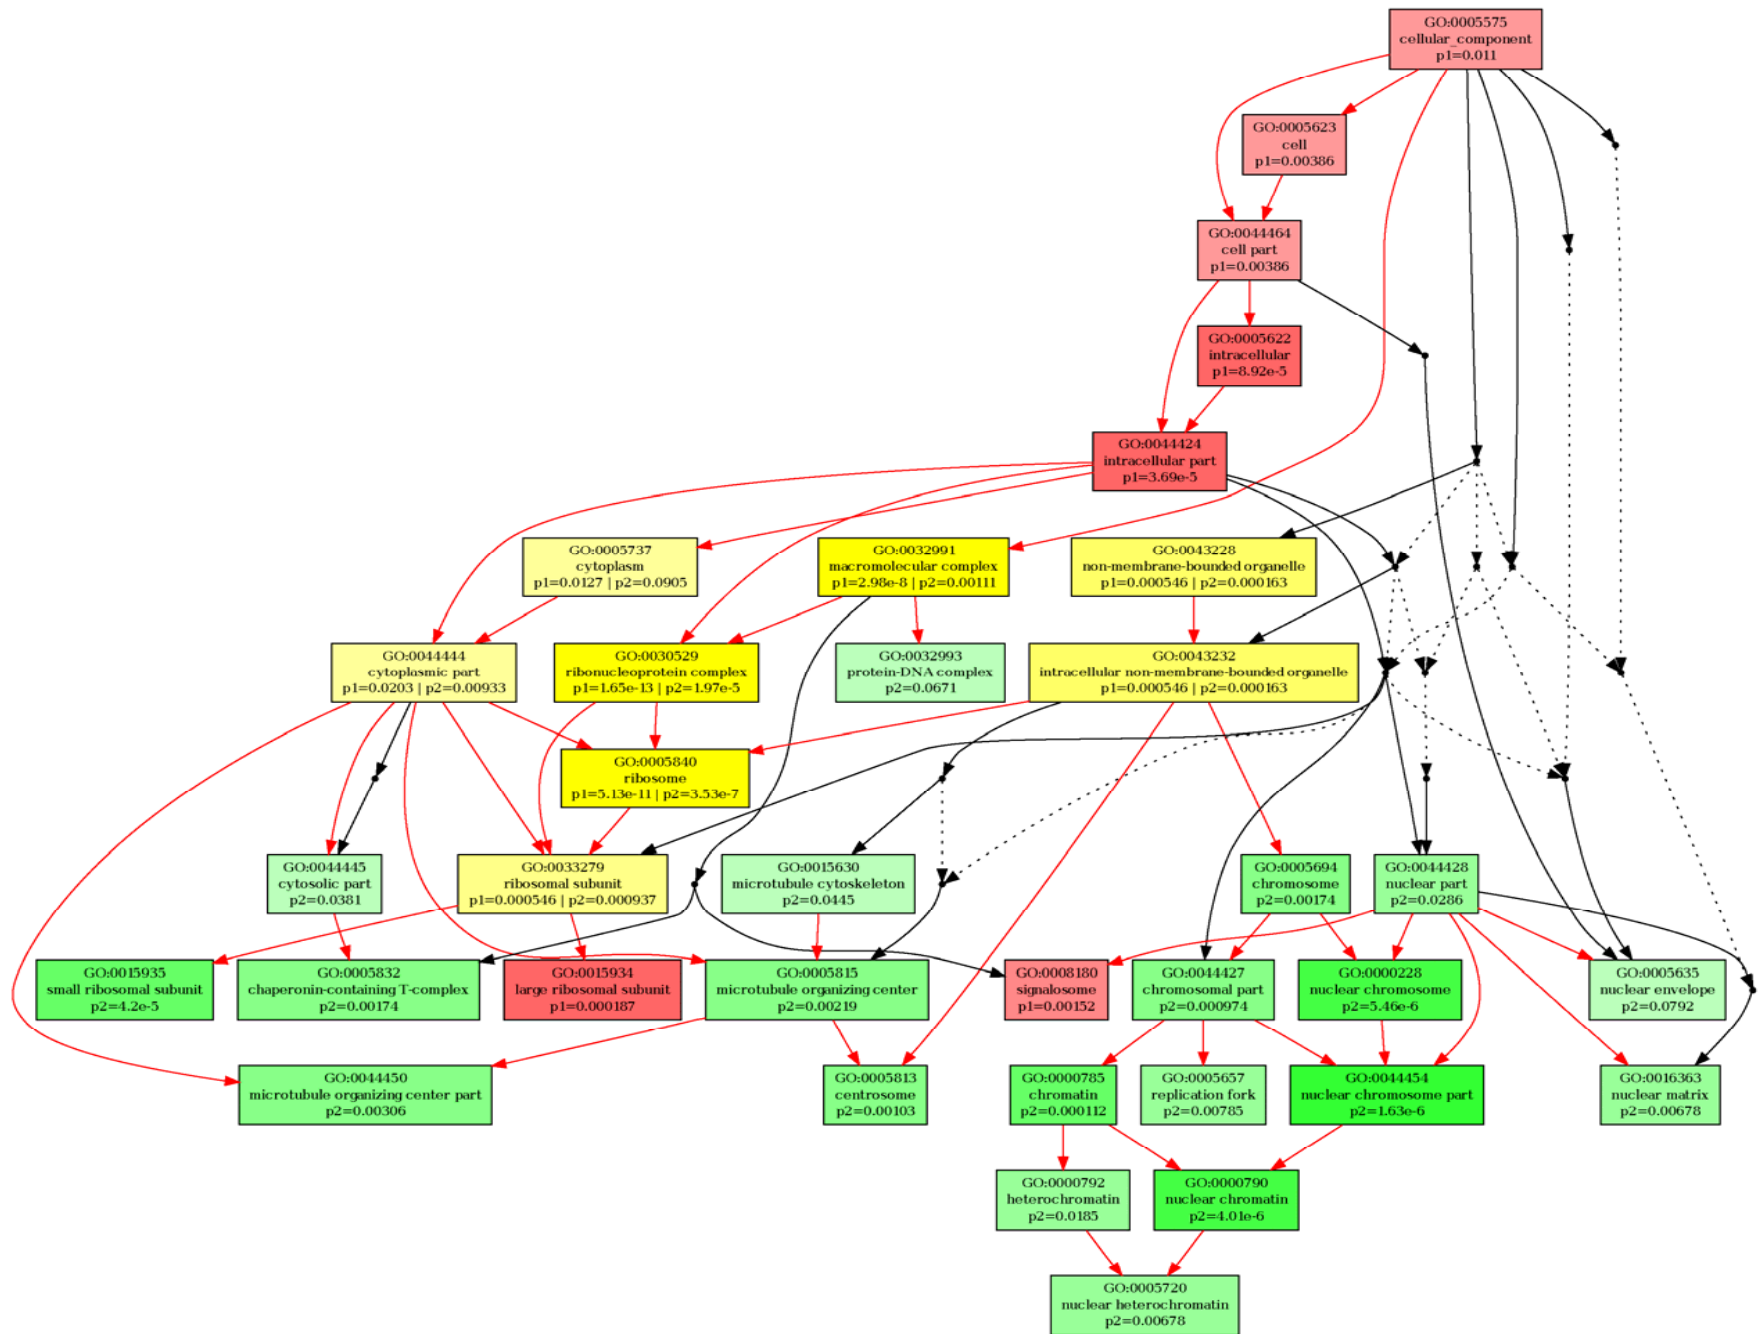

Supplement: gkp704_4.pdf [file gkp704_4.pdf]
