# Supplementary material for: Systematic identification and characterization of chicken (Gallus gallus) ncRNAs
Source: PubMed Central journal article supplement — Nucleic Acids Res. 2009 Aug 31;37(19):6562–74. doi: 10.1093/nar/gkp704 (PMC2770669; doi:10.1093/nar/gkp704), 2009-08-31

## Supplemental Figure 5

### Expression pattern of intronic snoRNAs during chicken muscle development

- Among the 102 snoRNAs, 89 were encoded by intronic regions of protein coding genes. Besides 13 snoRNAs in the right table, the expression pattern of the other 76 intronic snoRNAs during chicken muscle development were analyzed by Northern blot.
- The expression pattern of 76 intronic snoRNAs were shown as:
  - ✓ 9 snoRNAs hosted by ribosomal related genes
  - ✓ 9 hosted by translational related genes
  - ✓ 24 hosted by other functional genes
  - ✓ 34 hosted by unknown genes

- **Figure legend**

The expression pattern of each ncRNA during chicken muscle development was analyzed by Northern blot. The tested samples were from *Pectoralis major* muscles at different developmental stages of broiler (B) and layer (L) chickens, including embryonic days 12, 16, 18 (E12B, E12L, E16B, E16L, E18B, E18L), 2 weeks and 4 weeks after hatch (2WB, 2WL, 4WB, 4WL). Each ncRNA name was shown on the left of each blot, each host gene name was labeled on the right of each blot.

|        |                |
|--------|----------------|
| Ggn81  | SNORD49_75 nt  |
| Ggn102 | SNORD51_71 nt  |
| Ggn12  | SNORD58_67 nt  |
| Ggn30  | SNORD58_67 nt  |
| Ggn40  | SNORD36_72 nt  |
| Ggn69  | SNORD16_104 nt |
| Ggn75  | SNORD36_76 nt  |
| Ggn6   | SNORD18_66 nt  |
| Ggn115 | SNORA65_136 nt |
| Ggn49  | SNORA72_134 nt |
| Ggn14  | SNORD16_54 nt  |
| Ggn122 | SNORD15_143 nt |
| Ggn78  | SNORD15_149 nt |

## 9 snoRNAs hosted by ribosomal related genes

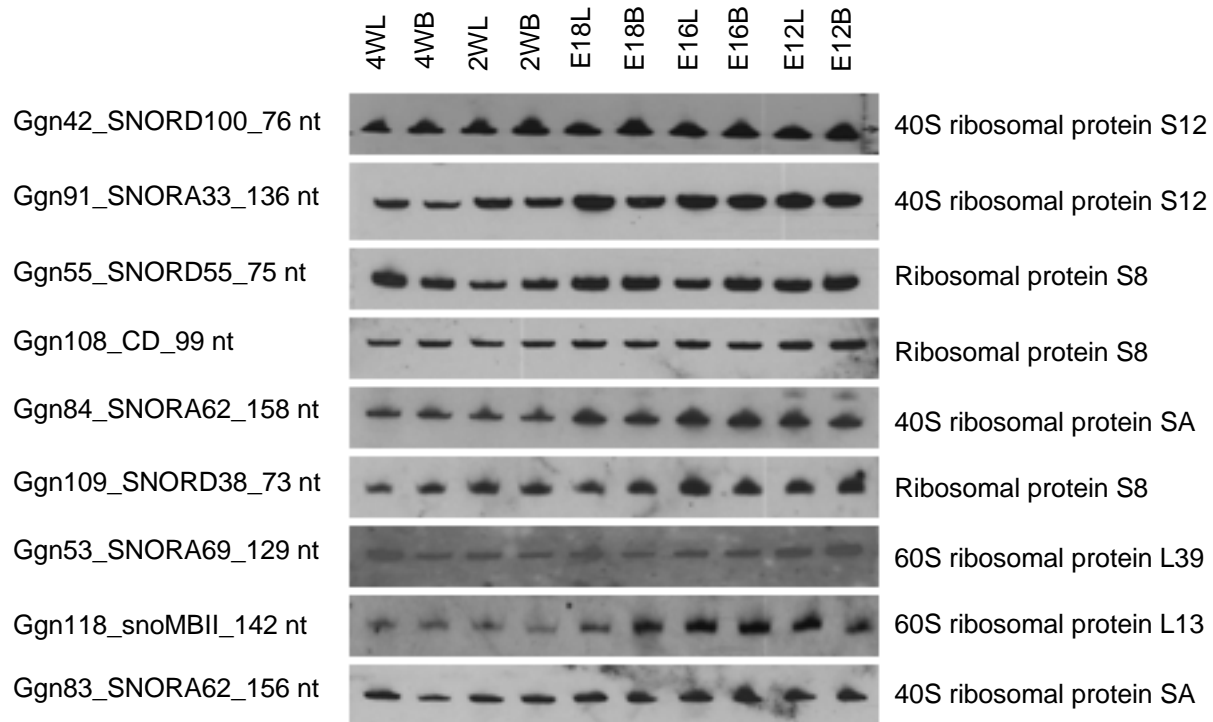





## 24 snoRNAs hosted by other functional genes (Continued)

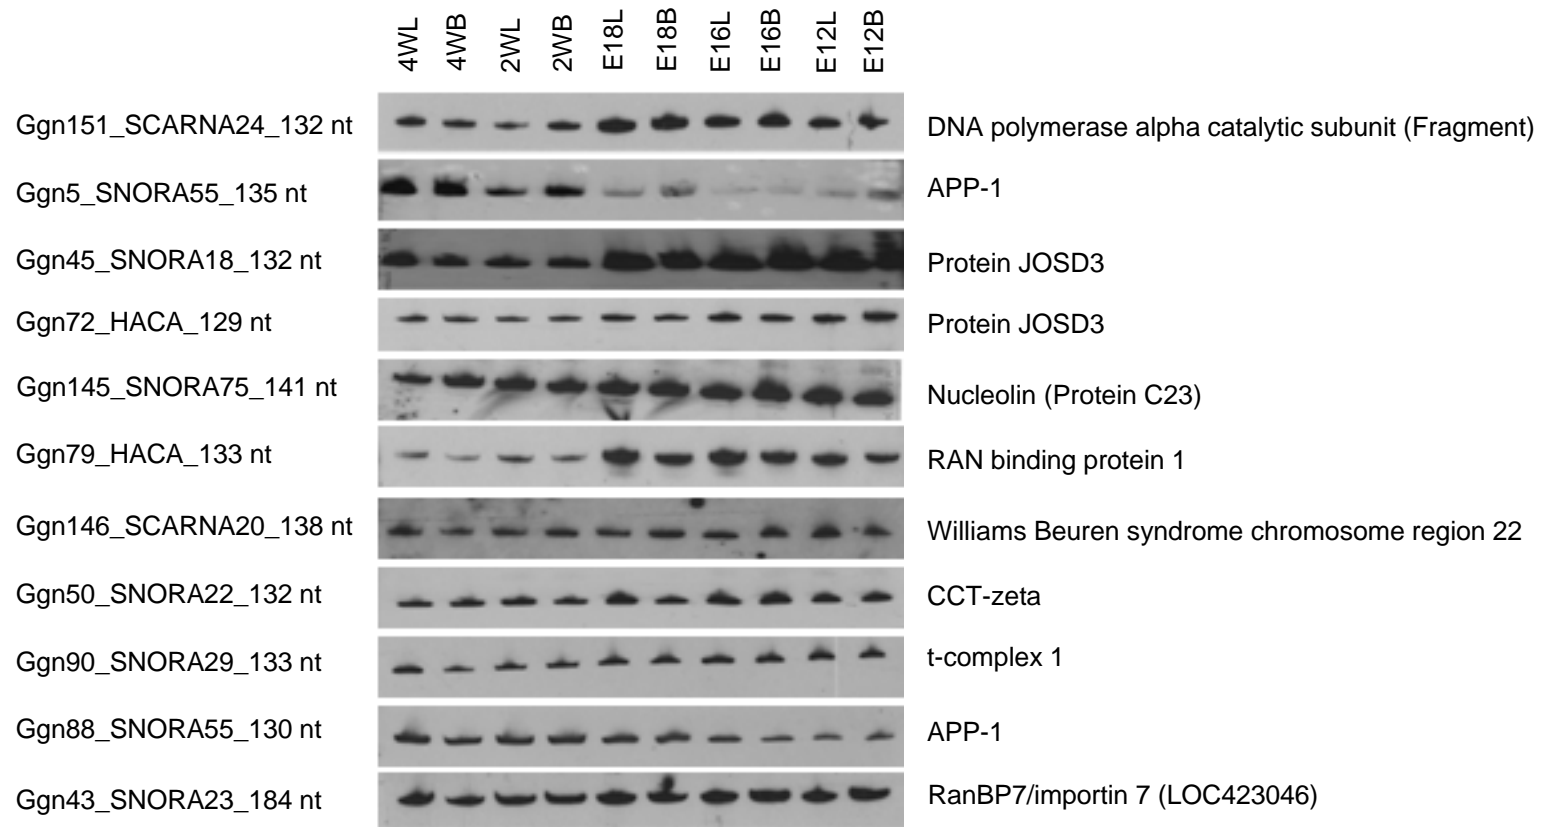

# 34 snoRNAs hosted by unknown genes

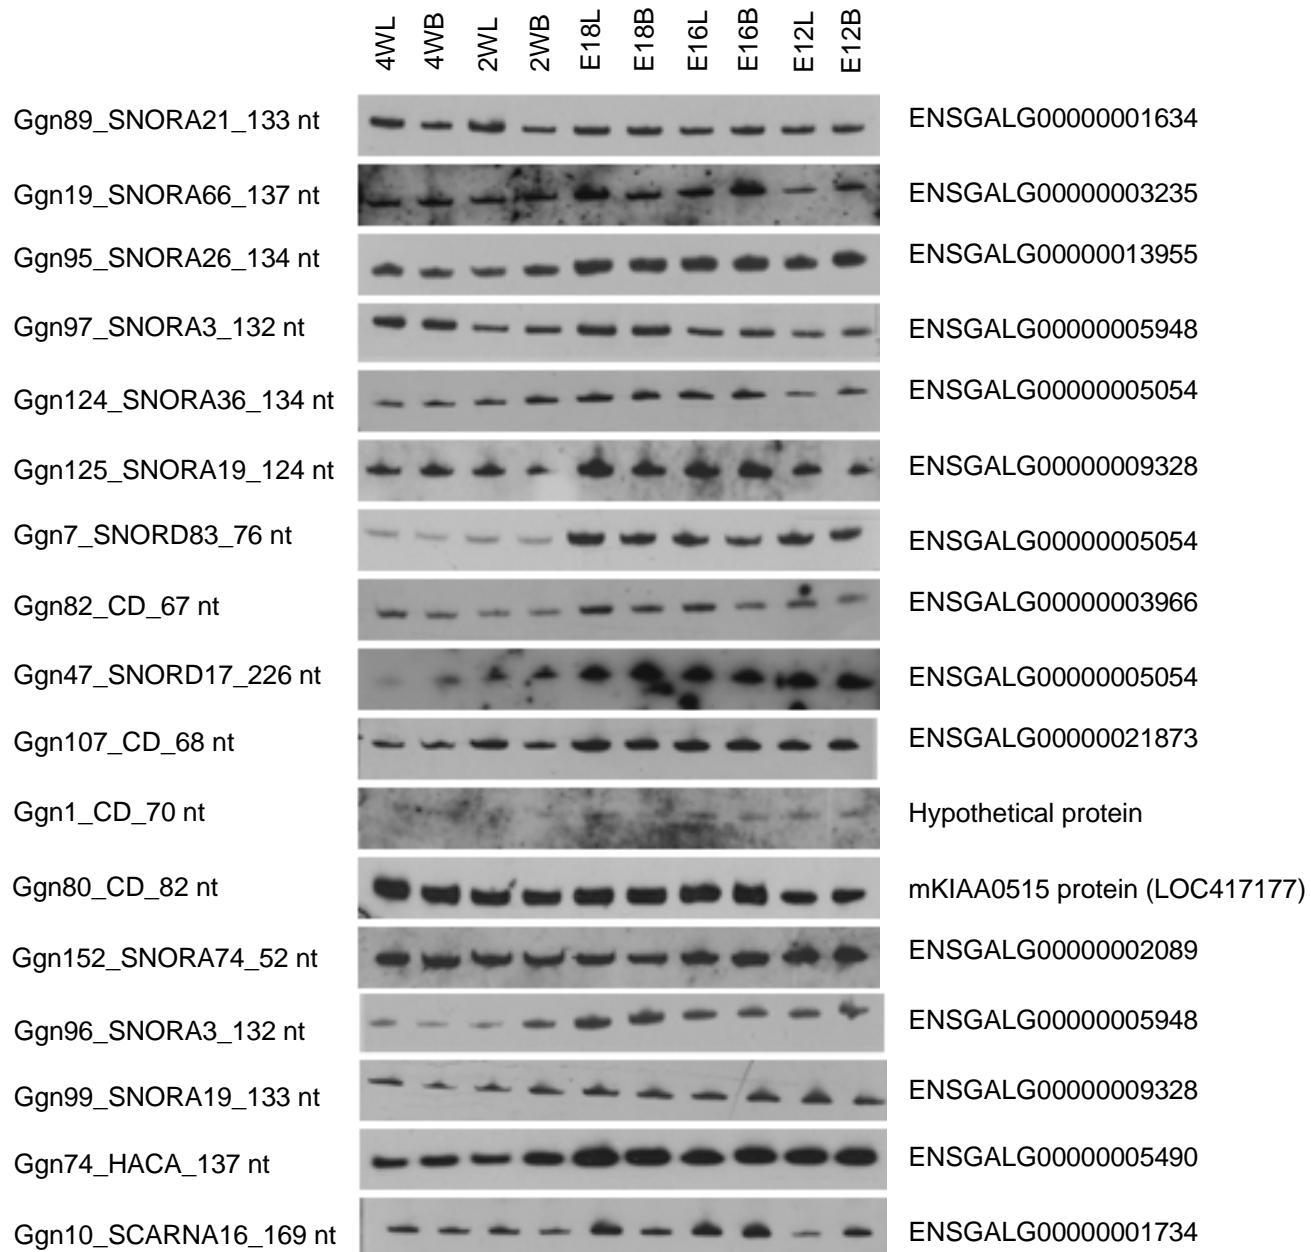

# 34 snoRNAs hosted by unknown genes (Continued)

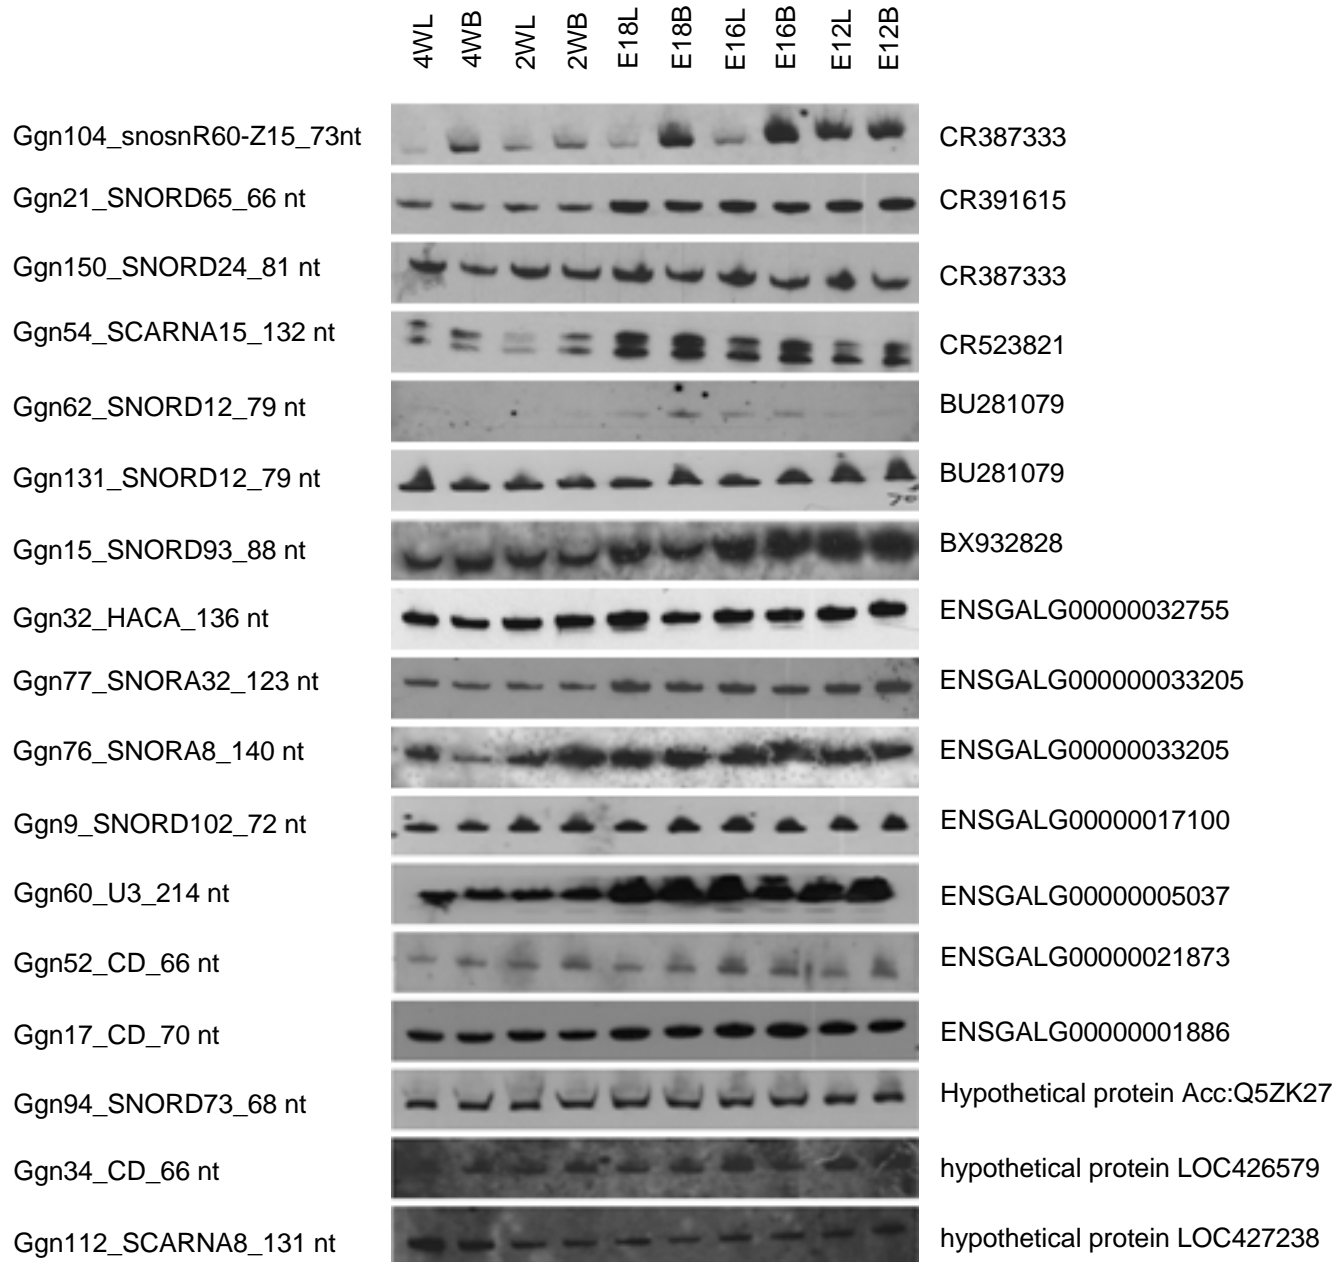

Supplement: gkp704_5.pdf [file gkp704_5.pdf]
