# Supplementary material for: Systematic identification and characterization of chicken (Gallus gallus) ncRNAs
Source: PubMed Central journal article supplement — Nucleic Acids Res. 2009 Aug 31;37(19):6562–74. doi: 10.1093/nar/gkp704 (PMC2770669; doi:10.1093/nar/gkp704), 2009-08-31
Supplement: gkp704_6.pdf [file gkp704_6.pdf]

## Supplemental file 1 Sequences of 125 chicken ncRNAs

>Ggn1\*

CTGATGTGATGAGTTTGTTCATGTCTCTTCTCTGAAAATGACACTGAAGGTAAGTCCAAAGACTCTGATC

>Ggn10

GAGGGCCTGGGGATGGCTGCTGGCGGCTGTGTCTCAGCCTGGTGCCTGCTGGCCTTACCCGTGCCCCAGATCAACC  
TCCAGAGGTCCCCCTGCTGGGTTCCCTCCTATGCAGTAACAGGTGTGAGCATCCATGCAGCATTCTGATGGTCATGTAT  
GATACTGCACACAAC

>Ggn100\*

TGGCAGTGATGATTCCATATATTGTGGTTTTCTGATGTACAAATGTGAGGGTGCACAGTCACTACCTCATCTGAGCCA

>Ggn101\*

TGTCCACAGTTACTGGTCTGAAACTGTTTCAGGACTGTAGCAGTTGCAGTATCCCTCTGTGGAAGATAAACTGTTAC  
GTAGTATTAAGCTCCTTCTCAGATCTTCTAAGAAGGACTTCTATGTAACAAAACAACG

>Ggn102\*

GTTACATGATGAATAAAAACAAAATCACCATCTTCGGCTGACAGCTGTGATGATTTGTTCTTTCTGAGT

>Ggn103

AACCGTCCTTATCTTGGGGTTGCGCGCCGCTCGATGAACGCGTGGTGAGAGCGGCACTGCTAACGCCTGAGCAAC  
ACACCGAGCGCCCGCTGCGCGCGCGGCGCAATTTTGAACCTCG

>Ggn104\*

TACAGTGATGATAACATAGTTCAGCAGATTATCTCGTGATGAACTATGTTCTGTCTTCGCTCCTATCTGATG

>Ggn105

GTAAATGATGTTGAATCAGGTCTCTGATCCCAGTGAGGATAAACTTGACTAAACGCTGATA

>Ggn107\*

ACAAATGATGATTAACCTTAGCTTGAACCTCTCTACTGAACAGAGATGAAAACCTAAGGTCTGAGT

>Ggn108\*

TGGGAGTGATGAAATTTTACCTTAGGTAGATACGACAGACTGTTCTGGTCGTTAACTGTATCTGCCAATGCTGGGGT  
TTGTCATAGTTACTGACCA

>Ggn109\*

CTTCTGGTGATGAGACCTTTGTCCAGTTCTGCTACTGAATTTGAGGGATGACTGTTTGGAGATCTGAAGAGGA

>Ggn11

TGCTCAATGATGATCATCTCCTTTGATTACCTGGTGAGGTAATATGAGAGGACATGGAATAATTTACCGGCGAACT  
GAGAGCA

>Ggn110

ACCTTCTGTCAAAGCACTGTGCTAAAATTACAGAAGCTGAGGCTGAGCTTTGGGTTCTGTAATAATGCTAGTAGAG  
TACACGCAAGAAGAAGAAAAGGATGCTCTGGATCGAAAATGACCGGGGTGGACCTCTTCTTAATGTCCGTTGTC  
CTGTGTCAGAAGATCCGGTGCAACAGTT

>Ggn111\*

AAAGCAGGATAAGTTATGATATAGCTGTGCAGTGTGTATTATCGTTCCCTGCTTAAAGAAAAATGTTTCCTTCTAT  
CCCTACCTGCTTAGTTCCACAGCAGGTAGGGACGCTGGGTTTCATACATCC

>Ggn112\*

CTGGGAGGCTGATACACAAATAGGGCTAAATCTGCTCTAGTTGTACATGTTCTCCCTATAGTAAAATTGCCTTCTGA  
TGACCGGGACGAATTGAGGGAAATCGTAACGGACAGATACGGGGCACACAAGT

>Ggn113

ATCGCTTCTCGGCCCTTTGGCTAAGATCAAGTGTAGTATCTGTTCTTATCAGTTAATATCTGATACGTCCTCGATGAG

AGGACTTTATATTAACGGATTTTTGGGCGCGGGAGTTGGACCCGGAGCTTGCTCCCTCCGCTCCGCGCATCGTCCC  
GGTATGGCAGTACCTCCGGGCACGGTGCACCA

>Ggn115\*

ACAGCCACCCGCCACTGTACCTGTCTTGTAAATGCAGTGACTTGTATAGTCCAGAGGTGGGCTGAGAGAAAATGCCAT  
CCTAGGAAACAGGGTTATCTTCTTGTGGGTAACCTGTGCGGAAGGCTGGGAACAGCA

>Ggn118\*

TCAGGTGATGAGAAGTCTCCGAATCGCTGTACTGCATTGATGATTCCCTCGAACCCCTAGTCTGTCTGATG

>Ggn119\*

TTGGCACAGTCTGAAAATCACCTGCGGTCTCCCGTGGCCCCGGTGAGATAACCGTGCCGACAGCATAGGGAACAT  
CAAAGCTTATTGCCACGGTGACAGTGTGTGGGGAGTGAACCCGTGTTCCATAACC

>Ggn12\*

TTGCTGTGATGACTTATCTTAGGACACCTTTGGAATACTCATGAAAAAAATGTTATTTCTGAGCAA

>Ggn120

GTGATACTGTGATTTACGCATGGAGTCTGTGATGTGTGAGCAGCTTCCATAGCCCGGTCACAGTTACAGAC

>Ggn121

AGCTTTGCGCAGTGGCAGTATCGTAGCCAATGAGGTTAATCCGAGGCGCGATTATTGCTAATTGAAAACCTTTCCCAA  
TACCCCGCCATGACGACTTGAAATATAGTCGGCATTGGCAATTTTGTACAGTCTCTACGGAGACTG

>Ggn122\*

TTCAGTGATGATAAGATGACGAGTCAGAAGGGATGGCTCCTGCTGAGTGGTGCCCTGCAGTGTACAGTTCTGTGCT  
GCTGCATGTGGTTCTTCAGCAGGAGCATCCCGTCGCTGAATGATTAGAGGCATTGTCTGAGAAG

>Ggn123\*

TGCCAAAAGCTTCATAATTGAGTGAAGGCTCTTGTAGCCTGAACTACTGGAGCTTCTTGAAGAGAAAAGACTATG  
CTCCACTATGGACTACACAGTTGTAGTTCGTACTAACAATGTAGTCAACAAAA

>Ggn124\*

AACCAAAGTGTTGAGTTCAGTTCAGGGTCTTGTCCCTGTCTGGTAATTAAGCTTTGGGACAGAAAGGACTGGGAA  
GTGCACCCTGGTACTGAAAGCCTGTTTTATGCCACCTGTGTTTCTCAGCCTACAGAC

>Ggn125\*

AAGCACTTCACATCTTTTTCTTTAATAGTGGGAACAAAGATAATTTGAAGTGCTAAAAAGAAGCTTGAAGGTAAATTA  
GCAGTGTGGTTAATGTTGCCAGTACTGTCAGTCACCTTCATACAAAA

>Ggn126

GGCTCGCGCAATTCCAAACCTGACAGTGGTTCTGGTTTGTGTCAGCCTCATAGAGCAAAAAGCGAGGGTTTATTCAC  
TGAAAAGGTGAAGCCGTTTCTTTTTCTTGCCTCCCTCACACTC

>Ggn128\*

CTCTGTGATGATCAAGCCTTTGAGCCACTGTGTCTGGCCACTGATGTCAGTGTGAACTGAGGATCTGAGC

>Ggn129

ATACTCTGGTTTCTCTTCAGATCGTATAAATCTTTCGCCTTTTACTAAAGATTTCCGTGGAGAGGAACAAACACGAGT  
GTCGTGGAATTTTTGAGGCTTCGCTTCGGCGGAGCT

>Ggn13\*

CAGCATCCTCTGATAGACCACGAGCAGTTTTCTGTGCTCTCTGG

>Ggn130

AGCTTTGCGCAGTGGCAGTATCGTAGCCAATGAGGTTTATCCGAGGCGCGATTATTGCTAGTTGAAAACCTTTCCCAA  
TACCCCGCCATGACGACTTGAAATATAGTCGGCATTGGCAATTTTGTAGAGCCTCCCGGAGGCTG

>Ggn131\*

GTAGGTGATGACTGAACTTTTTTCCCATCAGAGCGACAGTGTGATTACTCATCACTCTAGCCAGGTCTGTCTGAT

## G

>Ggn136

TCCTAGCGCTGCGGGCTGCCCGTGCCCGGCGCGCATTCACTTCCTTGCCAGAGGAAGCCCTGGGCGAGTGCTCGGC  
TCCAGCGTGCGGGCTCGGGTTCCACCGACTCAGATACAGC

>Ggn137

ATCGTCAGTGCGGTACATCCTGACCTGCCCCGCGAGTGCGGGCAGTGCGTGATGAGCGGAGTGTGATGACGCGTGA  
TTACAACCACGTGGCGCGGGCCGGCAACACCCGCGGGCACCTCTCTGATG

>Ggn138

AGTGCAGTGATCATAAACCAAAGCTGAACATGGAGCTCAGTGTGGTTTATTGTAGAGG

>Ggn14

CCTGCTGTGAGTGAACCTGGTACAGATGGTTGACGAGCAGTTAATGCTGAGCAAG

>Ggn140\*

GTGATGTGATGGTACACCATCTTCGGGGCTGACCTGAAATGGAGAGAACTTGTAATGCTGATCAC

>Ggn141

AAAGAGGGTTTGCATGGCTGGAGAACCAGCAGCTCTAACGCGAGTGACCGTACATTGAACTCCTTTCAGCAGGATG  
CTGTAGCCACTTTGTGTGCTGTGGTCTATTTTCAGAGGAGACAATT

>Ggn145

CACTTCTCAATGAGCTCCTTCCTGCCGACATATCCGTGGCAGCCTATGGATTTCGCACGAGAAGGACATAAACAGCTC  
AGTAGTGGCACACTCACAACTGGTTATACATCAGTTGTGATTAACCACTTACTGTTCTACAAG

>Ggn146

AGGTCTCTCCCATGGTAGCGTTGCAAGGAGGAGCCTCTCTGCAGCCAGTGGGAAGAGACAGAGAACAAAACC  
AGAGGAAAGTCGTCGTGGCTGCCAGGAACTGGTGGCTGTCATGTTTTCTGCCTCTTACTCTG

>Ggn147

AAAGGGCCGGCTTTAGCCCAGCGTTTCCTTCGGCAAACAGTTTCTGAGTTGCGGGCCCCGACTGGGGTTCGATCCC  
GCGGGCACCCCTGGCCCAT

>Ggn148

CGGCGCTGATGTTTCTAGACGCGTGTAGACTTCTGATACGGATGAAGTAAACCGATGTCTGAGCG

>Ggn15\*

TGGCCAGGGATGAAAACAATCATCTGATTACTTGCATACTTACAGTGTATGCAGAAGTCTGATGGATTAAGGATTT  
TCTGAGGCCA

>Ggn150\*

CCACAATGATGACTGTATAGTTTGCTACTCTTGACCAAGAAAATGATGAGAGCTCAAACCACCATAATTTCTATCTGA  
GGC

>Ggn151

ATGGACACGTAAGTTTTCTTTTCAGTTTCTCTCTATGTGGGAAAGCTGTACTAGTGTCTATAGTAACACAGAAGCT  
ATCTGTTCAACTCTGATGAGTTAATAGAGTTGGATCGTTCACCTTCTGACAGCT

>Ggn152

TGTGCTAAGGGTTTTCTTTTGGCCCTTCAGCGCTAGTCCGGAAGCATAATGC

>Ggn16

GAGGCTTGGATGTCTGCTGGGTTACAATGATTGGGGTGTTCATAGTTGCACTGAAG

>Ggn17\*

AGCCAGTGATGTGCTGTTATCCCTGTCTGACAACTCAGCTGTGAGGGAGAAACAATTGTCCACTGAGGCT

>Ggn19

TTGCAAACCTCGATCACTAGCTCTGCATGATGTTGCAGAAGCAAGGGGAACAGGTTTGCTAAAGTAAACATGGTAATA

GAACCATATTAGCCTTAGAAATCAAATGATTGGGGCTGTTAATTCTATACCATGATAAGG

>Ggn20

GCTGGTGATGAGATAGTTATCCCTGTCCGAAACGTTCTCTGTGGAAGCGTGAAGCTCTGAGG

>Ggn21\*

GAAACTAACCAAAAATTGCTGGAATTACCGGCAGATTGACTGGTGGTGAGCAAAGTTTTTCTGAT

>Ggn28

ACGCATACGGTTAAGGCACTGCCACCTACTTCGTGGCATCTAACCATGTTTTT

>Ggn29

CTGGAAGCTGTTGGGACCAGTTGGGACCGGTGGTGGGCAAAACAAGTGTGTTTGTCCACTCTTGCAGTCTTCCTAGA  
GTAAAGTGGAGGTCTCTGTCTGCTTTAGGAGAGCCAACATAAAGTGGATCGTTCCTCCATACATGT

>Ggn3\*

AGTCTGTGATGATGTAGTTCTTGGTTGGCCTGAATCCTTTTTGGAATATGAGGGCAACTTAAGTCACTACCTCTTCTG  
AGAC

>Ggn30\*

TTGCTGTGATGACTTTCTTAGGACACCTTTGGATTCAATGTGAAAAGAACTTGTATTCTGAGCAAT

>Ggn31

TAGAGCTATGACTGAGAAAAGTGATTGCTGACAGTTTGGGATTAATTCAGTGCCAGCTCCCCACAGTGAAGGGGTTT  
TGGTGCTGAATGTCATCCAACAGAACTGGTTGAGAGGAGCTCATGGTAGTGGTGTGCCTTCATTGGTTGTGCATGAT  
CTAAAGTTTTCAAGCTGAGACCT

>Ggn32\*

CAGCATCTGTTTGACAGACCTGGAGCAAAAACCCATTGCTTTTTCTGGTTCTTGTGAGATGCAACAGAAACAGGTTT  
CTTGCGCTTCCACCTGCCTGTCTTGTGGCAGTCTGGATTGAAGAAAGGAATACAAAC

>Ggn34\*

CATCATGATGATATCTTTGCCGTTTACCCATCTGACTGGTTGTTGATGTGTATCTTTGAATCTGAA

>Ggn36\*

TGGCAATGATGATTGGCGCAGGGGTACGGACCTCAGCTAGATCATGGGAGCTGAGTGCAAAGTGTGATTTCAGTGC  
AGCTGGCGTGTGGCTGGCTACTGGAAACAGGTTTGCATGAGAACTTCGCCAAAGACTGAGCCAT

>Ggn37

CGTCCGATGATGAACCTCAATGCTGTTACATCCTGACACGCCGTGACGAGCGCTGTCGAGCTGAGGACG

>Ggn38

ATGAAAATTTGGCTCCCTCTACTGAAAACAATGAGGAGAACTGCCTTAATCGTTACCCAAATCTTCTGAGAT

>Ggn39

GTGAGTGGGGTGGCGTGGGGCTGGAGGGCACCTCCCGGTGCTGTGCCCTTACCCCCATTCTCCA

>Ggn4\*

ATGCCCTGTTATTTCAGCAGGTAGACACAACCTCCATGTGTGTCTCAATTGAACAACGGGGCTAGAAGAGCAACAGGT  
TGTGCTTCTCTACTGTAACACCCATTGCAGTGGTGACAATGAGACCTGTGACAGGT

>Ggn40\*

TTGCGATGATGTGAATTTCTTACCTGAATCAACAATGAAGAGCAAAATGAGCTTTTTAACACTGAGCAA

>Ggn42\*

TACAATGATGAGACTTTGGCTCCCTCTACTGATACTTGTGAGGAAAGCAGCCATATGTTACCCAATACCTCTGAGA

>Ggn43

CTGCAGTACTGTGTGCATAGTTGTTTCATCTGTGTCTGGTGGTATAGTCTATTTGTGTTCTACATTTAGACTGTACTACT  
CACAAAAACCTGTGGCCAAAGATGAACTTGAGATCATAGTACTGGTCTAGTGACGTCTGAATGACATGCCTCCAC  
TGGCCAGCTCCATACTCTCAAACATCT

>Ggn44  
ATTAAAAACAAGCCCTGCAGTGTTTAAGCTCAGTGTGTAAAGGATGACACTGGGTTATAGCTCAGAGGCACAGAA

>Ggn45\*  
GTTGAGGTCTATCCCGATAGGATCTCTTCTGTAGGTTTCATGTCGTTGGAAACGCCTCACAGAACAACTTGTGGTTTA  
GTTTTACCCTTGGAGCTACCTGTTAGCTCTGTGGGATAGAATAACAAGACAAAT

>Ggn46\*  
TACGTATGAGGATACTTCGACGGGCGGACATAAGGAAATCGCCTCTGGCGCTTGTGTTGAGTGTGAGTCTCTGAC

>Ggn47\*  
TTTATCCATTCTCTGAGTGCAGTGGCACTGCCCTCCTGCAGCGCCCCGATTCTGTTCTAGGGTCTGGGTGCCGTGCA  
GCCTCCAGAGACCCTGCAGTCTCCAGTGTGCTGCTGGGGGCTGCTGTGGTGTGTGGCTGGCTGCCTGCAGGAGCC  
AAGCAGTGCCGGCCGGGTGAGGGCCCTCTGTGGGGGGCTCTGTCCCACTGAGACGAGGGATGACATCTGA

>Ggn49\*  
TGCGAATATTCTCGCTGCCCTGATATCCGGTGATCAGGGGAGGCTAGACATTCGCTATATTAATAACTATGCATTGTGT  
CCTCCAGGACTGGACTGCTGCTCTAGTACTGGCTTTGAAAATGCTAGTGACATAC

>Ggn5\*  
CAGCACCTGAATCTTTCCTATTCTTGTCTGTGCAGTGCAGGTCTGGGGACAGTTGGTGTCTACAGCACAGCAGCAGA  
AATCCAGATGGGTTACTTTCCTACTCGCTTGAACCTCATCTCTACAGCTCTGCAACATTT

>Ggn50  
TTGCACAGTGAACACCCAAGTGTGCTTCATAGTTCCTTGGTTTAAATTCTGTGCTAGAATAACCTGTGCTTTTCCTC  
TGCATTGGAAGGATTGGCAATCCTTTTATATGTATTGAGAAGGACAGTACATTT

>Ggn51  
TCTTGTGATGAATTCTACTTTGTGCCATCGTGTCTGGGCCACTGATACTCCATGATGGTAAAGAGGATCTGAGG

>Ggn52\*  
GCCTGTGTGATGAGACATGAATACACTGACTTCAATCATGGAGGTCTGCAATTAGCTCTATCTGAC

>Ggn53\*  
TAGCAGGCTGCAATTGCAGTGCTTCAATTCTGTGGGAGTACTGCCATTTTCCTGCTGAGAGTAATTCTGTAAATGCTGT  
GTTTGGTTTTACCTATATGTTGGTGAACCTGTTTGTCTTAACATGAACAT

>Ggn54\*  
CCCGGAGGACTAAGAAAGTGGAGTCGGTGCCTTCATGCCACCCCGCTGATACTATCCTCCAAAAGGAAATGGTGG  
AAGAACAAGGCTGCCCGGAGGTAAGGGCAGGGCCTGCTTCTCCGCCTACAGGG

>Ggn55\*  
TCTCAATGATGAAGCTTCTCTGACTGCTGCATAAAGCTGAGTGTGCTGTGCGGATGCCAACCTTGAGAGCTGAG

>Ggn56  
TGCCATGGACGAATTCTGCTATAGCTTTCTTCAGTAGCTATTGCAGTCAGACACTATGCCAGATTCAATCCCCTTTTA  
CACTCTGGCATGCTTTTTATATGTGAGTGGGCATGCCCTTGAAGTGGGATACAAC

>Ggn57  
ATGCCTTAAACTTATGAGTAAGGAAAATAACGACTCGGGGTGACGCCCGAGTCCCTCACTACTGATGTGAGAGGAATT  
TTTGTGCGGGTACAGGTCGTCCTCCCGGTGACCCGCTTACTTCGCGGGATGCCAGGTGCAATGATCTGCCCG

>Ggn58  
CATGCCCCAGTCTGTTGCAGATATGGCTGTAGTGCCATGTTGTGTCATTAGGTGGCAGAAAGGAAAAGGCTGTGT  
CTTTGCTAATGCTCTGAAACCGGTGAGCACTCAGGAATGACTAGCAACCTGACAAAT

>Ggn59  
ATATACTAAAATTGGAACGATACAGAGAAGATTAGCATGGCCCTGCGCAAGGATGACACGCAAATTCGTGAAGCGT  
TCCATATTTT

>Ggn6\*

AAATGATGAGATTCCACTTCAATGGTCCGTGTTTCTGAACCATATGATAACAGTGGAAGTTCTGAT

>Ggn60

AGGACTATACTTTCAGGGATCATTCTGTAGTTGGTAACTAGAGGAGTGTGATCGAAAGTGTCCGGCGTCACAAACC  
ACGAGGAGGAGCAGCGTGTCTCTCCTGAGCGCGAAGCGGGCGGGCGGTGCTGCTTGTGCAGGAGCCGCCGTCA  
TTGATGACCGTTCCTCCACTTGGTTGGGTCTGGGAGGGAGAGAAACACAGGCTGAGTGGT

>Ggn61

GGCTGGTCCGAAGGTAGTGGGGTGTCTCAATTGATTGTTACAGTCAAGTTACAGATTGATCTCCTCGTTCTCTTTTC  
CCCCCTTCCACTACTGCACTTGACTAGTCTT

>Ggn62\*

GTAGGTGATGACTGAACTTTTTTCCCATCAGAGCGACAGTGTGATTACTCATCACTCTAGCCAGATCTTGTCTGAT  
G

>Ggn63

ATACTTACCTGGCAGGGGAGACACCATGATCAGGCAGGTGGTTTTCCAGGGCGAGGCTCATCCCCTGCACTCCGG  
GTGTGCTGACCCCTGCGATTTCCCAAATGCGGGAAACTCGACTGCATAATTTGTGGTAGTGGGGACTGCGTTCGC  
GCTCTCCCCTG

>Ggn64

CTGAGCCCGCGGATCGCTTGAGCCAGGAGTCTGGGCTGCAGTGCCTATGCCGAGCGGGCGTCCGCGCTAAGG  
CCGGCATCAATATGGTGAGCCCCGGGGAGCCGAGGCACACCAGGTTGCCTAAGGAGGGGTGAACCGGCCAGGTC  
GGAAACGGAGCAGGTCAAAACTCCCGTGCCGGTCAAGTACGGGATCGCGCTGTGAATAGCCACTGCAGCGTAGC  
CTGGGCAACACAGAGAGACGCGGGTTCCT

>Ggn65

ATACTCTGGTTTCTCTTCAGATCGTATAAATCTTTCGCCTTTACTAAAGATTTCCGTGGAGAGGAACAAGCACGAGT  
GTCGTGGAATTTTTTGAGGCTCCGCTTCGGCGGAGCTA

>Ggn66

CCACATGCTCCTTAGATCCATCTTTGTGAGTATCTTTGTGCTGAGTTCTGCTGGATAAATTTCAGTTTCTAGCAGTTCCA  
GTCAAAGTTGCTCGGCAACTTTTTGTTGTACGGTCAAAGATGCTTGAGTCATTGGCATGTGAGAGTAATATAACT  
GCATGTTAGCTTCTGTTCTGATAAAAGTACTGTAAATATGAGAGTCATTTACCGCTATCAGGACATGGCTGGTATG  
CAGACATTG

>Ggn67\*

TCTTACCCTCTCAAGTTAGGAGGGTGTGTAAGATGTTTGCAAACCCTTAAAGGCAAGAGAGGACATCA

>Ggn68

GGCCCAGTGATGATCAAGTATCGCGCTAAGAGAGAACAGGTCCAGCAGTCAGCGTCTGGGCAGCCTGCACTTCATG  
CTTTTCCCTCTTTACTCTTTTCATATCACCTTTCTTCTCTGCTTTTTTTTCCCTCCTCACCTTTTCTTGTCTTTTCT  
GCTTTGCTCTTCTGCCAGATAAGACTGTGGCCTCCTCAATGATGGCTAAGATTATGAGATCTGAGGGCT

>Ggn69\*

TTGCTGTGATGATGTAATTTGCGTCTTATCCAGTGTTCAGCGACAGTTGCCTGCTGTTACCATGTTGGCACTGTTGAG  
CTGCAGACACATTTAATTCTGAGCAA

>Ggn7\*

GCCAAATGATGTCAGCTAGATGGCATTAGCACTCAGTGCAAAGATGACCTTCATCTATCACCCCATGCTGATGGCT

>Ggn70\*

AGGCTGTGATGAGTTTTGGCATGTATTATCTGAGCATAAGTGTGAAGATTATCAGTTTAGCTCTAGAATACTCTGAG  
ACCT

>Ggn71\*

AACAATGATGACAGGACTGTAAGTGTATGTGATATTTTCATTACTGCATGGAGACACCAGTCCCTCTAAACTGATGT  
>Ggn72  
CAGCACGTGTTTCAGTTTTTGTCTGGTGTCTGTAGACAAAAACCTGGAACCTGGTGTCTTAGAAAAACACCTTCTTTTCGC  
AACCCACAGCTGATGCATGTATTGGCTGTGTTACTTATATGAAGGGACAGTG  
>Ggn73  
AAGCACTATTTTTAAACCTGTTGGTGGATTTTCTGGCCATCATGGGTACGCTGTAGTGCAAAAAGAATCTCCTGGCT  
CTTCAGAGTATAGTTGGCCTTCTGTTTGGCTGATGCTGCTCTGAAGCTAAGGGACAGAG  
>Ggn74\*  
ATCTCCAATCTGCGCGGTTGCATTTGCTTGAAGTAGTGTAAGTGTGCGTAAATGGAGAGAGAAAGGAAACTGAATTT  
TAAGAGTATAACAGAGAGATCCTCTTATGGTCTCTCTGTTTCTCTGAAATTCTACTT  
>Ggn75\*  
TGCCAGTGATGTATGAATTTCTCACCTGAGCTCAAAGTGAAGAGCGAAATAGACGAGCTTTTTAACCTGAGCTT  
>Ggn76\*  
TTGCACTGAATGGTATCTGCACCCAGCAGCGTTCTTCTGATGGGGTGTTCAAAACCAAGTGTACAGTAATTCAGCA  
TTTGGCATCGTTGGTTTTCACTCTGCAGTGGTTGTTAAACCTGGTATTCTTGCTGATACAGGT  
>Ggn77\*  
CTGGTCATTACCAAGGCTGCAAGGATATTGCTGTTCTGGTGTGAGCTGTGGACATGACCATATAGCAAGTCCATCAGA  
CTCTTGAATTGCTGCGTTGTGTGGCAGTAGGTCTGCTGGGAATAAA  
>Ggn78\*  
CCTTCAGTGATGATAAGATGACGAGTCAGAAGGGATGTCCTTGTGCCAGCACAGCCTGGTCAAGTGCATGTTCTGTG  
GTGCTGTACTAAGGCTGCCTTGGGCAGGATGTCCTCTCATTGGTTGATTGAGGCAATTTGTCTGAGAAGG  
>Ggn79  
GAGCAGACTCACTCTGACTGAACTGCAGTCTTTCAGTTCAGGTGCTTTTTCTGTCTGCAAGAGTAATCACTCACAGG  
CGTGATGAATGCCTTCTTCTGTTGGAAGGCTGTTACAATTGCTAATGGGACATTG  
>Ggn80\*  
ATGCAGTGATGATCTCTTAAGTAGTGGTTTCAATTCAGTATTGTTGAATGAAGACCTGAATTTCTTGGCTGTGTCT  
GAGCGT  
>Ggn81\*  
GTACATGATGACACAATGGATCCTTCTGATCCTTCCATCAAAGTACTCTAGGAACTGGATCTGAAGACTCCTAAAAG  
CTGAA  
>Ggn82\*  
GTTGATGATGATACCCAGAATAGGAAGTGCCGTCAGATGCGAGAAGTACGATAACCTTCTTATTATCTGAAA  
>Ggn83\*  
TACAAGTGATGATTCAAGCGACCAAGCCTGAGAGTTTGTGATTAGAACTTCTTTGGTAACTGATG  
>Ggn84\*  
CTTGACACAGTTGGAACCTGGAGCTGAGGCCATCCTGTGGCCAAGGAACTCTCAAGCGTAGGATGTGTGCTACAG  
TAACATGGCAGGACTTACTGACAGCCTGAGGCCCTTTGTGGCCAATGAAAGGAGTTTGGTAGTCAATCTTGCCAC  
AGTT  
>Ggn85\*  
TTGCACACTGTTAAAGCTTGATGCTGAGGTCAGTTCCTGACCAATGAGCTCTCAAGTGTGCGAAGTGTGCTACAAC  
AAAGCTGTTGGCAGGGTGTCTGCTAATGCCAGGAGAGGAGCTGCCTCTATGATTGGAGTTTGTAGCAGCCCTGCC  
ACATGC  
>Ggn86\*  
GGCTGGTCCGATGGCAATGGCATTATAATAATTGATCACAGTCCGTTACAGATTTCTTTGCTCTTCTCCACTCCAC

TGCTGCATTTGACTAGTCT

>Ggn86

CGATCCTTCCGGTTCATAGCAAATGATGAATGGGAGTTGCACGCGGCTGCGTGACGTGTGCGCCCTTTGTTACGACG  
TGCACAGCCCCCTTCTGAGC

>Ggn87

CTGCATGTTAATCCAAGAGCTGTGGCTCTGACGTAGCTGCAGGTCTCCAACAACATGCAAGAGCAACGGGAAGGTC  
TTGACTGCTCGGCCTCTTCTGCCTGTTGCTGTCACTACCCCTCTATATAT

>Ggn88\*

AGGCACCTAATCTTTCCATTCCTTGCTGTGCAGTGTGAGCCTGGGGACGCATGGTGCTGACAGAAAAGCAGAGTA  
AATCCAGACAAGTGGTTCTTCATTGACTAATTGTCTCTACACCTCTGCAACAGT

>Ggn89\*

CACCCTTCTCAAAGCACTCGTTGGGTCTGCGTGCCGTGGCTCAGTGAGTTGTCGTGGAAGGGCAGAGAAAAGCAT  
CGCTTTTGGGTGAAGTGGCAGCCCGTGCTGTTGATTCAATGGGCGATGTGACAACG

>Ggn9\*

CTTGATGATGATTGTCTCCTATGATTGCTTGCTGAAAGCAAAGTGATCAAATCATTTCACCGGCACTGAAAG

>Ggn90\*

ATCCCATTATACTACCACTTTTTCAATCTCCAGAGGAAGTGGCTATGCTTGTGGGATAGAGGAAAATGTTGCCACGG  
TCTGAAGGAAAAGTTGATTGTATCTTTTTCTACATGAAGTTGGCAGGACATCA

>Ggn91

CACCAGTTAATAATCTCTGCTCAACTTGAAAGTGTTTTGCAGGGCATGTTTTAAAACACTACTGGTAAACTAAAGCC  
ACAGTACGAGCCTTGAAGAAAATTTCTTGTCTTTGAGGTCCCAAGAGATGGCTACATCT

>Ggn92

GGATGTGAGGGCGATCTGGCTGCGACATCTGTCAACCCATTGATCGCCAGGGTTGATTCCGGCTGATCTGGCTGGCTA  
GGCGGGTGTCCCCTTCCTCCCTCACCGCTCCATGTGCGTCCCTCCGAAGCTGCGCGCTCGGTGCAAGAGGACGAC  
CTTCCCGATAGAGACGGTACCGTTCATCGGTCAAGGTATACGGTAGCTGCGCTCCCCTGCTAGAACCTCCAAACA  
AGCTCAAGGTCCATTTGTAGGAGAACGTAGGGTAGTCAAGCTTCCAAGACTGCAGACACATCCAAGTGAGGCACTG  
CATGGGGCAGTCTGCCATTGTT

>Ggn94\*

ATGAATGATGACAAATGTTTCGGTCCCAGATGACACGAAATGATTTAATTTCCCATTTTCTGACA

>Ggn95

ACTCCCCTTTTTAGCTTTGCCCTCTTAAGTCTGTCAAGTGTCTTAAGTGGCCAGTACGGAGGGGTATAACAGTTCTCTC  
TCAAACCCAGAGGTGAGGCTGAACTCTTCTTTGGATCACGCTGAGAGGAACATGT

>Ggn96

GCCGAGACTAGAGTCACGTCTGGACAGTGCCTGTTGTCCCAGATGTGCTAGAGTACTCGAATAGTAACCACTAATCTA  
TATTAAGTGGCTGTGACCACTCCTGTCTCGGTGAGTACAGGATTAAGTACAGGA

>Ggn97\*

ACTGAGAATAGAGTCACATCTTTACATGTTCTGTTGTTCTGGTGTGCTATCGTTCTCAGATATAAACTTCTGATCCTCA  
TTCACTGGCTGCGATACCTCATACTCAGTCAGCCACCAAATCAGTGACAGTA

>Ggn98

GTGCAAGCAACACTCTGTAGTAAGCATTGGTTGCCTGCTGCAATTTAAGCTTGCTAAATCAGAAAAGTCTAACCTA  
TTCCAGGGATCTCTGCTTTGTGAGGTCGCTTGTATATAGACTTGTACAGCC

>Ggn99\*

ACGCACATTTCAATGACCTGCTTTCAATGCAAGTGATGAGCAGTGTATTTCTGGTGTGCTAAAGAAATATTTGAAGG  
CTAATTAGCAGCTTAGCTGTACGTAGTACTGCTGCCAGTCTCCTTCATACAAAG



\* ncRNAs were independently predicted by Qu's group (1).

(1) Shao, P., Yang, J.H., Zhou, H., Guan, D.G. and Qu, L.H. (2009) Genome-wide analysis of chicken snoRNAs provides unique implications for the evolution of vertebrate snoRNAs. *BMC Genomics*, **10**, 86.
