# Supplementary material for: Systematic identification and characterization of chicken (Gallus gallus) ncRNAs
Source: PubMed Central journal article supplement — Nucleic Acids Res. 2009 Aug 31;37(19):6562–74. doi: 10.1093/nar/gkp704 (PMC2770669; doi:10.1093/nar/gkp704), 2009-08-31
Supplement: gkp704_7.pdf [file gkp704_7.pdf]

## Supplemental File 3 Putative targets of novel snoRNA candidates

Modification sites were marked in red.

### 1. Ggn11

Ggn11: 63 AUUUCACCGGCG 74 (5' -3')  
|||||||  
28S: 3509 UAAAGUGGCCGC 3498 (3' -5')

### 2. Ggn20

Ggn20: 15 AGUUAUCCUGU 26 (5' -3')  
|||||||  
28S: 3854 UCAAUAGGGACA 3843 (3' -5')

### 3. Ggn37

Ggn37: 21 UGCUGUUCACAU 32 (5' -3')  
|||||||  
28S: 2184 ACGACAAGUGUA 2173 (3' -5')

### 4. Ggn100

Ggn100:58 GUCACUACCUC 68 (5' -3')  
|||||||  
18S: 478 CAGUGAUGGAG 468 (3' -5')

### 5. Ggn107

Ggn107:24 CUUGAACUCUCUC 36 (5' -3')  
|||||||  
28S: 422 GAACUUGAGAGAG 410 (3' -5')

### 6. Ggn108

Ggn108:81 GUCAUAGUUAC 91 (5' -3')  
|||||||  
28S: 3256 CAGUAUCAUG 3246 (3' -5')

## 7. Ggn123

Ggn123: GCUCCAC--UpStem---ACUAA-(N)11-ACA (5' -3')  
          |||||                  |||||  
18S-1305 CGAGGUG--G-Ψsite-UGAUU (3' -5')

## 8. Ggn17

Ggn17: 16 GUUAUCCUGU 26 (5' -3')  
          |||||  
28S: 3853 CAUAGGACA 3843 (3' -5')

## 9. Ggn32

Ggn32 CUUGCUCU--UpStem---UUGAA-(N)9-ACA (5' -3')  
      |::|||||                  |||||  
LSU3223 GGGCGCAA--G-Ψsite-AACUU (3' -5')

## 10. Ggn34

Ggn34: 19 GCCGUUACCC 29 (5' -3')  
          |||||  
28S: 3241 CGGCAAUGG 3231 (3' -5')

## 11. Ggn52

18S: 161 CUAGAGCUAAU 171 (5' -3')  
          |||||  
Ggn52: 61 UAUCUGAUUA 51 (3' -5')

## 12. Ggn71

18S: 1398 UUAAGGGAC 1408 (5' -3')  
          |||||  
Ggn71: 70 AAUCUCCUG 60 (3' -5')

## 13. Ggn74

Ggn74 UCUGC--UpStem---CGUA-(N)11-AAAGGA (5' -3')  
          ||||                  |||  
28S-4393 AGACG--A-Ψsite-GCAU (3' -5')

#### 14. Ggn80

18S: 547 AGGAUCCAUG 558 (5' -3')  
          |||||  
Ggn80: 25 UCCUAGGUAAC 14 (3' -5')

#### 15. Ggn82

Ggn82: 18 AGCGACCAAAG 28 (5' -3')  
          |||||  
18S: 128 UCGCUGGUUC 118 (3' -5')

#### 18S rRNA sequences

TACCTGGTTGATCCTGCCAGTAGCATATGCTTGTCTCAAAGATTAAGCCATGCATGTCTAAGT  
ACACACGGGCGGTACAGTGAAACTGCGAATGGCTCATTAAATCAGTTATGGTTCCTTTGGTC  
GCTCCCCTCCCGTTACTTGGATAACTGTGGTAATTCTAGAGCTAATACATGCCGACGAGCGC  
CGACCTCCGGGGACGCGTGCATTTATCAGACCAAACCAACCCGGGCTCGCCCGGCGGCTT  
TGGTGA CTCTAGATAACCTCGAGCCGATCGCACGCCCCCGTGGCGGGACGACCCATTCTGA  
ATGTCTGCCCTATCAACTTTCGATGGTACTGTCTGTGCCTACCATGGTGACCACGGGTAACG  
GGGAATCAGGGTTCGATTCGGAGAGGGAGCCTGAGAAACGGCTACCACATCCAAGGAAG  
GCAGCAGGCGCGCAAATTACCCACTCCCGACCCGGGAGGTAGTGACGAAAAATAACAAT  
ACAGGACTCTTTCGAGGCCCTGTAATTGGAATGAGTCCACTTTAAATCCTTTAACGAGGATC  
CATTGGAGGGCAAGTCTGGTGCCAGCAGCCGCGGTAATTCCAGCTCCAATAGCGTATATTA  
AGTTGCTGCAGTTAAAAAGCTCGTAGTTGGATCTTGGGATCGAGCTGGCGGTCCGCCGCGA  
GGCGAGCTACCGCCTGTCCCAGCCCCTGTCTCTCGGCGCCCCCTCGATGCTCTTAACTGAGT  
GTCCCGCGGGGCCCGAAGCGTTTACTTTGAAAAAATTAGAGTGTTCAAAGCAGGCTGGCC  
GCCGGAATACTCCAGCTAGGAATAATGGAATAGGACTCCGGTTCTATTTTGTGGTTTTTCGG  
AAACGGGGCCATGATTAAGAGGGACGGCCGGGGCATTTCGTATTGTGCCGCTAGAGGTGA  
AATCTTGGACCGGCGCAAGACGAACTAAAGCGAAAGCATTTGCCAAGAATGTTTTCTATTA  
ATCAAGAACGAAAGTCGGAGGTTCAAGACGATCAGATAACGTCGTAGTTCCGACCATAAA  
CGATGCCGACTCGCGATCCGGCGGCGTTATTCCCATGACCCGCCGGGCAGCTCCCGGAAA  
CCCAAGTCTTTGGGTTCCGGGGGGAGTATGGTTGCAAAGCTGAACTTAAAGGAATTGACG  
GAAGGGCACCACCAGGAGTGGAGCCTGCGGCTTAATTTGACTCAACACGGGAAACCTCAC  
CCGGCCCGGACACGGACAGGATTGACAGATTGAGAGCTCTTCTCGATTCCGTGGGTGGTG  
GTGCATGGCCGTTCTTAGTTGGTGGAGCGATTTGTCTGGTTAATTCCGATAACGAACGAGAC  
TCTGGCATGCTAACTAGTTACGCGACCCCCGAGCGGTCCGCGTCCAACCTTCTTAGAGGGAC  
AAGTGGCGTTCAGCCACCCGAGATTGAGCAATAACAGGTCTGTGATGCCCTTAGATGTCCG  
GGGCTGCACGCGCGCTACACTGACTGGCTCAGCTTGTGTCTACCCTACGCCGGCAGGCGCG  
GGTAACCCGTTGAACCCCATTCGTGATGGGGATCGGGGATTGCAATTATCCCATGAACGA  
GGAATCCAGTAAGTGCGGGTCATAAGCTCGCGTTGATTAAGTCCCTGCCCTTTGTACACA  
CCGCCCCTCGCTACTACCGATTGGATGGTTTAGTGAGGTCCTCGGATCGGCCCGGCGGGG  
TCGGCCACGGCCCTGCCGGAGCGTTCGAGAAGACGGTTCGAACTTGACTATCTAGAGGAAGT  
AAAAGTCGTAACAAGGTTTCCGTAGGTGAACCTGCGGAAGGATCA

28S rRNA sequences

CCCGTTTCCGTTTCGCGACCTCAGGTCAGACGTGGCGACCCCTTTAATTTAAGCATATTAGTC  
AGCGGAGGAAAAGAACTACCTAGGATTCCTCAGTAACGGCGAGTGAAGAGGGAAGAG  
CCCAGCGCCGAATCCCCGCCCCGCGGTGGGGCGCGGGAGGTGTGGCGTACGGAAGCCCC  
ATCCCCGGCGCCGCTCTCGGGGGGCCAAGTCCTTCTGATCGAGGCCAGCCCGCGGACG  
GTGTGAGGCCGGTAGCGGCCCGCGCGCCGGGCCCGGGGCTTCTCGGAGTCGGGTTG  
CTTGGAATGCAGCCAAAGCGGGTGGTAACTCCATCTAAGGCTAAATACCGGCACGAGA  
CCGATAGCCAACAAGTACCGTAAGGGAAAGTTGAAAAGAACTTTGAAGAGAGAGTTCAAG  
AGGGCGTGAAACCGTTAAGAGGTAAACGGGTGGGGTCCGCGCAGTCGGCCCCGAGGATTC  
AACCCGGCGGGCCAAGGTCGGCCGGCGCGGGCGCCGTCGGATCCCCGCTCCGCTCCCC  
TCCGTCCCTCCCCTTCGCCGGGGCGGGGCGGGCCAGGGGGGGCGGGCGGGCCGGGGACC  
GCCGCCCGGCCGGCGTCCGGCCCCCGTCCGGCGCATTTCTCCGCGCGGTGCGCCGCGA  
CCGGTCCGGGACGGCTGGGAAGGGCTGCCGGCGGGCAGGTGGCCCCGGCGCCGCGGAG  
CGGCCGCCGGGTGTTATAGCCGCCGGGCCCGGATCGTCGCCGAATCCCGGGGCCGAGGGA  
GAGGACCGCCGCGCGCCCTCCCCGGAGGGGGCGGCCCCCCGGAGGGCCCCCGCGGCC  
GGACCGCGTCCGGCCGGCCGCGCCGCGCGCGTCCGCGCCGCCGCGTACGCCGCCGC  
TCGCTCTCTCCGTTCCCCGCCCGGGTCCGTCCCGGGGCGCGGGGGCGGGGGGGTCCG  
GGTGTCCGGCGCGGGTGGGCGCGCGCCGCGCGTGTGGCGCGCGCATCCAGCCCGGCG  
CGGGCGAGGCCGCGGGGGCGCCGGGGGGGAACCTTCCCCCTTCTGTTCCGGCCGCCTCC  
GTTCCCGCGGGGGCGGCCCGTTCGGGGGACGGGCCCGCCGCCCCCGCGCCGCTGTCCG  
ACCGGGGCGGACTGCGCTCAGTGCGCCCGACCGCGCGGGCGCCGCCGGGCCGGGCTCGGG  
CCACGCCAGGGCGCCCGGGGTCCGCGGCGACGTCGGTACCCACCCGACCCGTCTTAAA  
CACGGACCAAGGAGTCTAGCACGCGCGGAGTCGGCGGCTCGCGGAAAGCCCGCGGCG  
CAATGAAGGTGAGGGCCGGCGCGCGCCGGTGTAGGTGGGATCCCGGGGCGGCAGGCCGG  
AAGGCCCGGGCGCACCAACCGGCCCGTCTCGCCCGCCTCGCCGGGGAGGTGGAGCATGAG  
CGCGCGTGTAGGACCCGAAAGATGGTGAACATATGCCTGGGCAGGGCGAAGCCAGAGGAA  
ACTCTGGTGGAGGTCCGTAGCGGTCTGACGTGCAAATCGGTCTCGTCCGACCCGGGTATAGG  
GGCGAAAGACTAATCGAACCATCTAGTAGCTGGTTCCCTCCGAAGTTTCCCTCAGGATAGCT  
GGCGCTCGGGGCGGCGGTGCAGTTTTACCCGGTAAAGCGAATGATTAGAGGTCTTGGGGCC  
GAAACGATCTCAAACCTATTCTCAAACCTTTCAATGGGTAAGACGCCCGGCTCGCTGGCGTGG  
AGCCGGGCCGTGGAATGCGAGCGCTCAGTGGGCCACTTTTGGTAAGCAGAAGTGGCGCTG  
CGGATGAACCGAACGCCGGTAAAGGCGCCCGATGCCGACGCTCATCAGAGCCCAGAAA  
AGGTGTTGGTTGATCTAGACAGCAGGACGGTGGCCATGGAAGTCGGAACCCGCTAAGGAG  
TGTGTAACAACCTACCTGCCGAATCAACTAGCCCTGAAAATGGATGGCGCTGGAGCGTCAG  
GCCATAACCCGGCCGTCCCGGGCGGTGCGGAGCCGCGGGGGCTACGCCGCGACGAGTAGG  
AGGGCCGCTGCGGTGCGCCTGGAAGCCTGGGGCGCGGGCCCCGGGTGGAGCCCGCCGAGG  
TGCAGATCTTGGTGGTAGTAGCAACTATTCAAACGAGAGCTTTGAAGGCCGAAGTGGAGCA  
GGGTTCCATGTGAACAGCAGTTGAACATGGGTGAGTTGGTCTTAAGCGATAGGCGAGCGCC  
GTTCCGAAGGGACGGGCGATAGCCTCCGTTGCCCTCAGCCGATCGAAAGGGAGTCGGGTT  
CAGATCCCCGAATCCGGGGCGGCGGAGACGGGCGCCGCGAGGCGCCAGTGCGGTAACGC  
AAGCGATCCCGGAGAAGCCGGCGGGAGCCCCGGGGAGAGTTCTCTTTTCTTTGTGAAGGG  
CCGGGCGCCCTGGAACGGGTTCGCCCGAGAGAGGGGGCCCGCGCCTTGGAAAGCGTCCGC  
GTTCCGGCGGCGTCCGGTGAGCTCTCGCTGGCCCGTGAAAATCCGGGGGAGAGGGTGTAA  
ATCTCGCGCCGGGCCGTACCCATATCCGCAGCAGGTCTCCAAGGTGAACAGCCTCTGGCAT

GTTGGACCAATGTAGGTAAGGGAAGTCGGCAAGCCGGATCCGTAAC TTCGGGATAAGGATT  
GGCTCTAAGGGCTGGGTTCGGTTCGGGCTGGGGCGCGAAGCGGGGCTGGGCGCGCGCCGCG  
GCTGGACGAGGCGCCGCCCGCCCCGCCCCCCTTTCCCCGCTCCCGCTCGCCGGGGCGCC  
GGGGGGGGGGTTCAGCGGGCGGCGGGCGGGCGGCGACTCTGGACGCGCGCCGGGCCCTT  
CCCGTGGATCGCCCCAGCTGCGGGCGGGCGCCGCTCGCCCCCTCCTTGCCCTCCGCCCC  
CCGCTCCCGGCGCCCTCCCGTTCGGCCGTCGTCGCGGCCGCCCCCGTCCCGAGCGCCCTC  
CCCGCGAGGGCGCGAGGGGCGGCGGGCGGGCGGGCGGGCGGGCGGGCGGGGGGGGG  
GCCCGCCGGCGGCGCCGGGCGGGGCGGTCCCGGGCGGGGGGGTCTCCGGGCCGGCGCC  
CCGCTCGGCCGGCGCCTAGCAGCCGGCTTAGAACTGGTGCGGACCAGGGGAATCCGACT  
GTTAATTAACAAAGCATCGCGAAGGCCCGCGGGCGGTGTTGACGCGATGTGATTTCTG  
CCCAGTGCTCTGAATGTCAAAGTGAAGAAATCAATGAAGCGCGGGTAAACGGCGGGAGT  
AACTATGACTCTCTTAAGGTAGCCAAATGCCTCGTCATCTAATTAGTGACGCGCATGAATGG  
ATGAACGAGATTCCCCTACTGTCCTACCTACTCTCCAGCGAAACCACAGCCAAGGGAACGGG  
CTTGCGGAATCAGCGGGGAAAGAAGACCCTGTTGAGCTTGACTCTAGTCTGGCGCTGTG  
AAGAGACATGAGAGGTGTAGAATAAGTGGGAGGCCCGCGGTTCGCGCGACCCGCGCCGCG  
GCCCGGCCCGCGGTGAAATACCACTACTCTGATCGTTTTTTCACTTACCCGGTGAGGCGGG  
GGGGCGAGCCCCGAGGGGCTCTCGCTTCTGGCGCCAAGCGCCCGGCGCGCGCCGGGCGCG  
ACCCGCTCCGGGGACAGCGTCAGGTGGGGAGTTTGACTGGGGCGGTACACCTGTCAAAGC  
GTAACGCAGGTGTCTAAGGCGAGCTCAGGGAGGCCAGAAACCTCCCGTGGAGCAGAAG  
GGCAAAGCTCGCTTGATCTTGATTTTTCAGTACGAATACAGACCGTGAAAGCGGGGCCTCA  
CGATCCTTCTGACTTTTTGGGTTTTAAGCAGGAGGTGTCAGAAAAGTTACCACAGGGATAA  
CTGGCTTGTGGCGGCAAGCGTTCATAGCGACGTCGCTTTTTGATCCTTCGATGTCGGCTCT  
TCCTATCATTGTGAAGCAGAAATCACCAAGCGTTGGATTGTTACCCACTAATAGGGAACGT  
GAGCTGGGTTTAGACCGTCGTGAGACAGGTTAGTTTTACCCTACTGATGATGTGTTGTTGCG  
CTAGTAATCCTGCTCAGTACGAGAGGAACCGCAGGTTTCAGACATTTGGTGTATGTGCTTGGC  
TGAGGAGCCACTGGAGCGAGGCTACCATCTGTGGGATTATGACTGAACGCCTCTAAGTCAG  
AATCCCCCTAAACGTAGCGATACCGCAGCGCCGAGGCGCCTCGGTGGGCTCGCGATAGCC  
GGCCGCCGCCCTCGGGCGGGCGGTTCGGTTCGGAGCGCCGCTCGTGGTTCGGGACCGGA  
GCGCGGACAGATGTGGCGCCGCTCTCCCCGCCGCGTACCGCATGTTTCGTGGGGAACCCG  
GTGCTAAATCATTTCGTAGACGACCTGATTCTGGGTCGGGGTTTTCGTACGTAGCAGAGCAGCT  
CCCTCGCTGCGATCTATTGAGAGTCAGCCCTCGACACAAGCTTTTTGTCGGAGCGCGGAGCG  
CGCGCGCGCGCGCGCTGGCGGCGCCCCGGCGCGGGGCCGGTCCGGCGGGCCAGTCGG  
TCGGCTCCCGCGCCGCTCCGTTTTGTTCCCTGGGTTTCGTTTCGT
