# Supplementary material for: Systematic identification and characterization of chicken (Gallus gallus) ncRNAs
Source: PubMed Central journal article supplement — Nucleic Acids Res. 2009 Aug 31;37(19):6562–74. doi: 10.1093/nar/gkp704 (PMC2770669; doi:10.1093/nar/gkp704), 2009-08-31
Supplement: gkp704_8.pdf [file gkp704_8.pdf]

## Supplemental file 4 All oligo sequences used in this study

(Underlined: RNA; *Italisc*: Restriction Endonuclease site; p.: 5' phosphate; -x: 3'-DMT.)

>5AD: 5' adaptor

GGAGUAGCAUGCGUGACGAAAA

>3AD: 3' adaptor

p.UUUUGACCACGAGCTCACAGGG-x

>5CD: 5' PCR primer

GGAGTAGCATGCGTGACGAAA

>3RT : 3' reverse transcription & PCR primer

CCCTGTGAGCTCGTGGTCAA

>5S-1pA: probe used for removal of 5S rRNA

AAAAAAAAAAAAAAAAAAAAAAAAACGAGATCAGACGAGATCG

>5S-2pA: probe used for removal of 5S rRNA

AAAAAAAAAAAAAAAAAAAAAAAAAGTCTCCCATCCAAGTACTAAC

>5.8S-1pA: probe used for removal of 5.8S rRNA

5'-AAAAAAAAAAAAAAAAAAAAAAAAAGAGTGATCCACCGCTAAG

>5.8S-2pA: probe used for removal of 5.8S rRNA

AAAAAAAAAAAAAAAAAAAAAAAAACCCTCAGACAGGCGTAG

>U1-1pA: probe used for removal of U1 snRNA

AAAAAAAAAAAAAAAAAAAAAAAAACACCTGCCTGATCATGGT

>U1-2pA: probe used for removal of U1 snRNA

AAAAAAAAAAAAAAAAAAAAAAAAACTACCACAAATTATGCAGTCG

>U2-1pA: probe used for removal of U2 snRNA

AAAAAAAAAAAAAAAAAAAAAAAAACAGATACTACACTTGATCT

>U2-2pA: probe used for removal of U2 snRNA

AAAAAAAAAAAAAAAAAAAAAAAAAGGAGCGGAGGGAGCAAGCT

>U4-1pA: probe used for removal of U4 snRNA

AAAAAAAAAAAAAAAAAAAAAAAAAGGGGTATTGGGAAAAGTTTC

>U4-2pA: probe used for removal of U4 snRNA

AAAAAAAAAAAAAAAAAAAAAAAAAGCCGACTATATTGCAAGTCG

>U5-1pA: probe used for removal of U5 snRNA

AAAAAAAAAAAAAAAAAAAAAAAAAGCCTCAAAAAATTCCACGAC

>U5-2pA: probe used for removal of U5 snRNA

AAAAAAAAAAAAAAAAAAAAAAAAAGGCGAAAGATTTATACGATC

Primers for PFKM minigene cloning into pcDNA4 vector

Forward primer for wild type PFKM minigene: 5'-**CCCAAGCTT**GCTTTCTCACTGCTGTTTTCC-3' (HindIII)

Reverse primer for wild type PFKM minigene: 5'**CCGCTCGAGGGG**ATGAGGGCTGTGTGC3' (Xho I)

Forward primer for 5' splicing site mutagenesis: 5'-ATCGGGGGCTTTGAG**CT**GAG-3' (Red C is a mutant)

Reverse primer for 5' splicing site mutagenesis: 5'-ACCCCACTCA**G**CTCAAAGCC-3' (Red C is a mutant)
